# Supplementary material for: Understanding Temporal Patterns and Determinants of Ground-Level Ozone
Source: MDPI journal article supplement (doi:10.3390/atmos14030604), 2023-03-22
Supplement: s1 [file s1]

Archive with 1 entries (1 files):
- atmosphere-2275318-supplementary.pdf
