# Supplementary material for: Understanding Temporal Patterns and Determinants of Ground-Level Ozone
Source: MDPI journal article supplement (doi:10.3390/atmos14030604), 2023-03-22
Supplement: s1 [file s1 › atmosphere-2275318-supplementary.pdf]

# Supplementary Materials: Understanding Temporal Patterns and Determinants of Ground-Level Ozone

Junshun Wang <sup>1</sup>, Jin Dong <sup>1</sup>, Jingxian Guo <sup>1</sup>, Panli Cai <sup>1</sup>, Runkui Li <sup>1,2,3,4,\*</sup>, Xiaoping Zhang <sup>1</sup>, Qun Xu <sup>5,6</sup> and Xianfeng Song <sup>1,3</sup>

<sup>1</sup> College of Resources and Environment, University of Chinese Academy of Sciences, Beijing 100049, China

<sup>2</sup> Binzhou Institute of Technology, Binzhou 256606, China

<sup>3</sup> State Key Laboratory of Resources and Environmental Information System, Institute of Geographic Sciences and Natural Resources Research, Chinese Academy of Sciences, Beijing 100101, China

<sup>4</sup> Beijing Yanshan Earth Critical Zone National Research Station, University of Chinese Academy of Sciences, Beijing 101408, China

<sup>5</sup> Department of Epidemiology and Biostatistics, Institute of Basic Medical Sciences Chinese Academy of Medical Sciences, School of Basic Medicine Peking Union Medical College, Beijing 100005, China

<sup>6</sup> Center of Environmental and Health Sciences, Chinese Academy of Medical Sciences, Peking Union Medical College, Beijing 100005, China

\* Correspondence: lirk@ucas.ac.cn; Tel.: +86-10-69672954

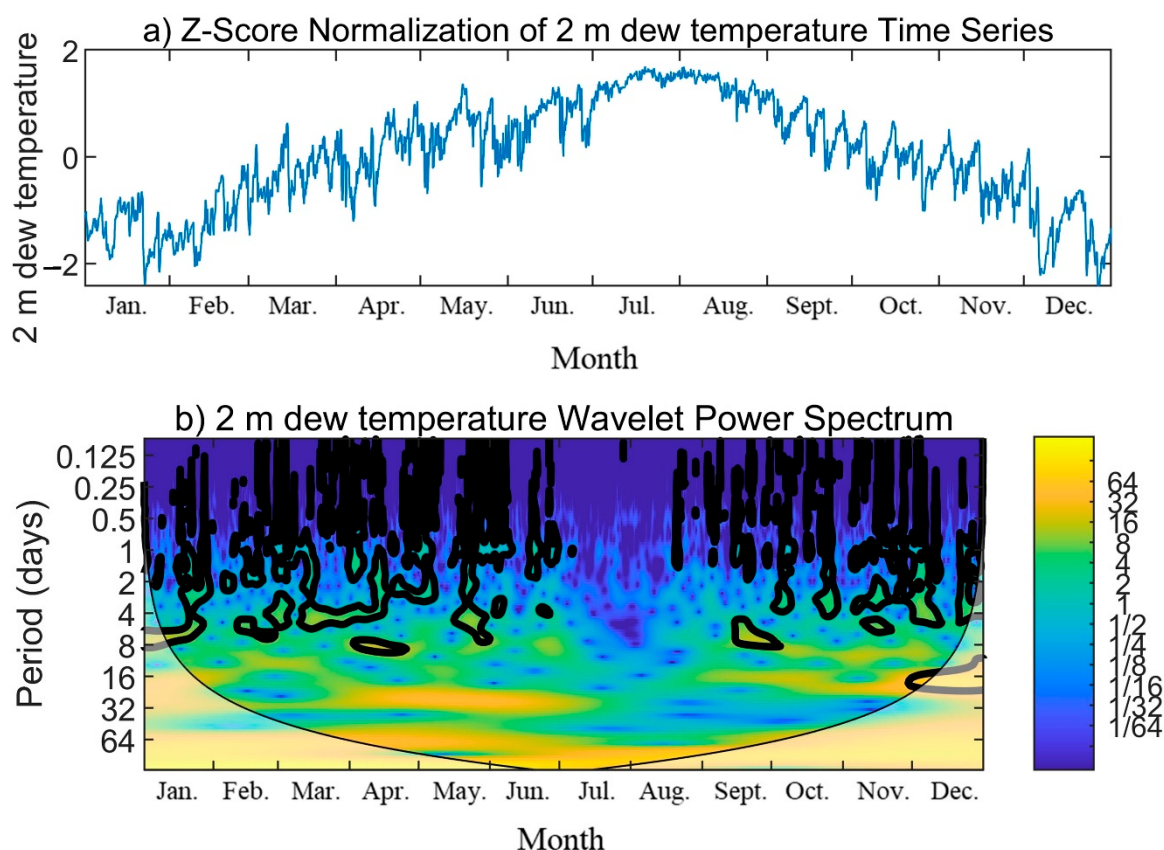

**Figure S1.** Z-Score normalization time series (a) and wavelet power spectrum (b) of 2m dew temperature. Line charts represent Z-Score normalization time series for each factor. In the wavelet power spectrum, the left axis is the period, the right axis represents periodic intensity and the bottom axis is time. The thick contour enclosed regions of greater than 95% confidence for a red-noise process and thick curve is cone of influence (COI).

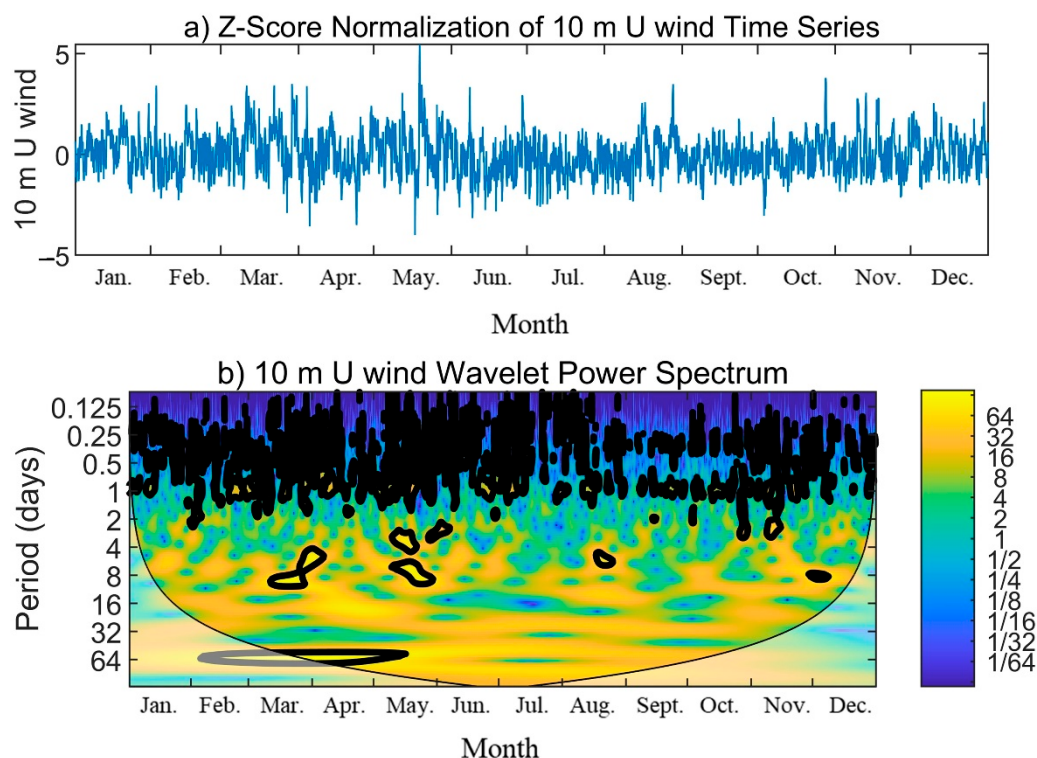

**Figure S2.** Z-Score normalization time series (a) and wavelet power spectrum (b) of 10m u-component of wind (10 m U wind). The illustration of figure is the same as Figure S1.

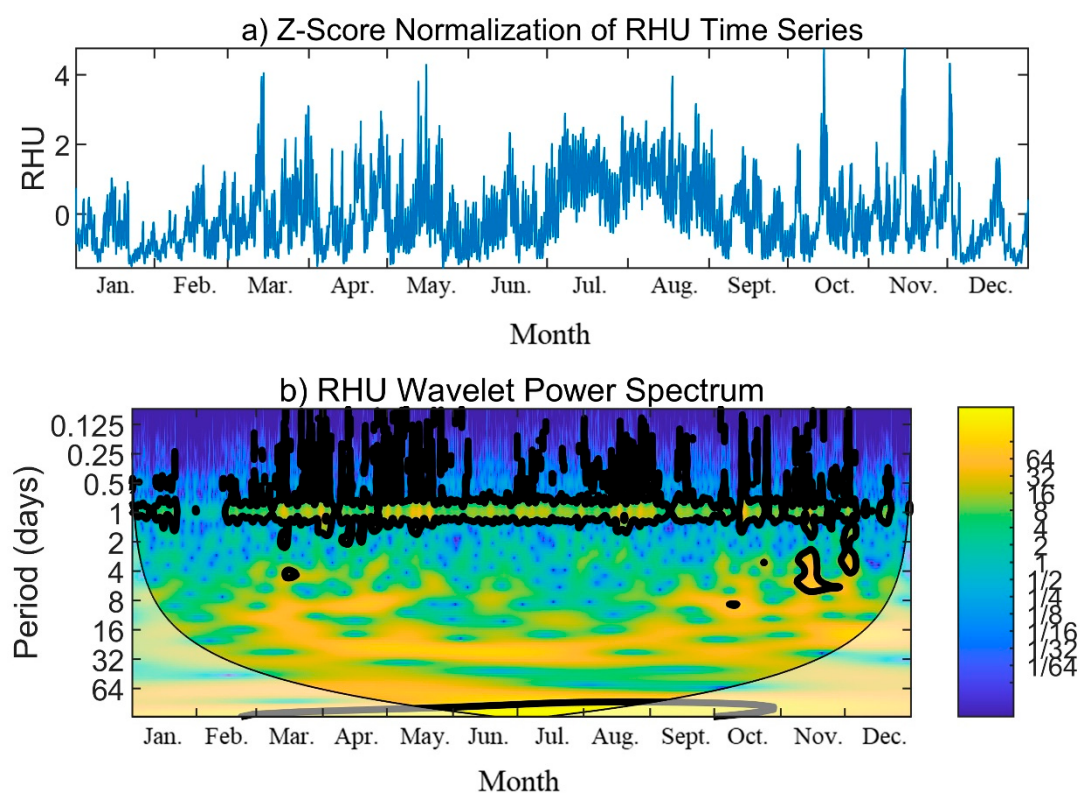

**Figure S3.** Z-Score normalization time series (a) and wavelet power spectrum (b) of relative humidity (RHU). The illustration of figure is the same as Figure S1.

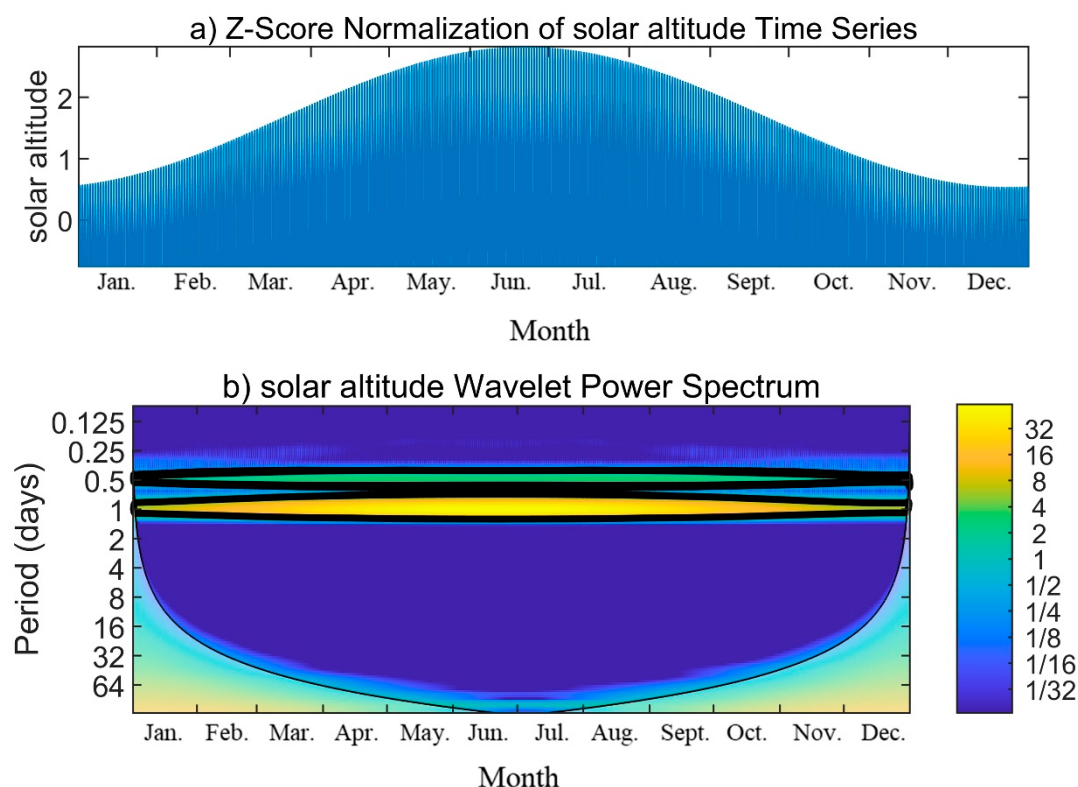

**Figure S4.** Z-Score normalization time series (a) and wavelet power spectrum (b) of solar altitude. The illustration of figure is the same as Figure S1.

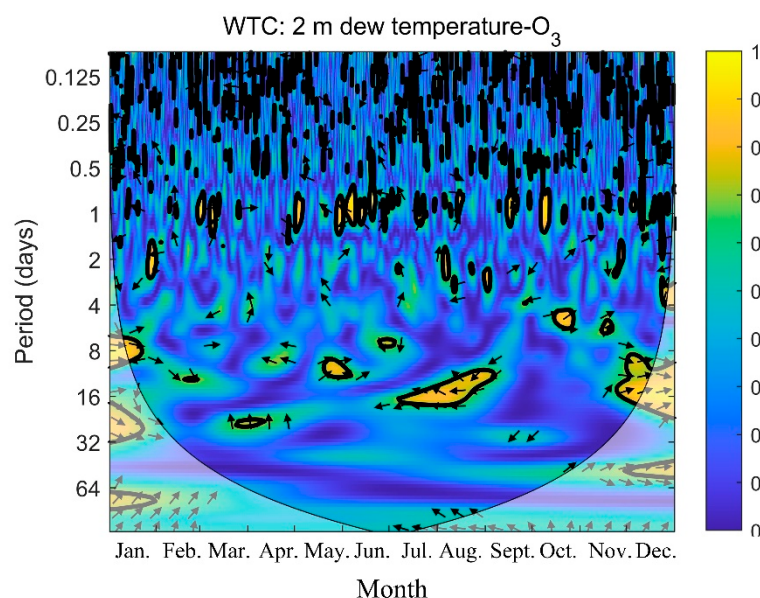

**Figure S5.** Wavelet coherence spectrum (WTC) of 2m dew temperature and O<sub>3</sub>. The left axis is the period, the right axis represents consistency of changing trends, the bottom axis is time. The area surrounded by the thick black solid line indicates the area that passes the 95% red noise confidence test, and the black solid line envelope is the conical influence domain; the relative phase relationship is shown by the arrows (in-phase points to the right, anti-phase points to the left, NO<sub>2</sub> leads O<sub>3</sub> 1/4 period when points straight up).

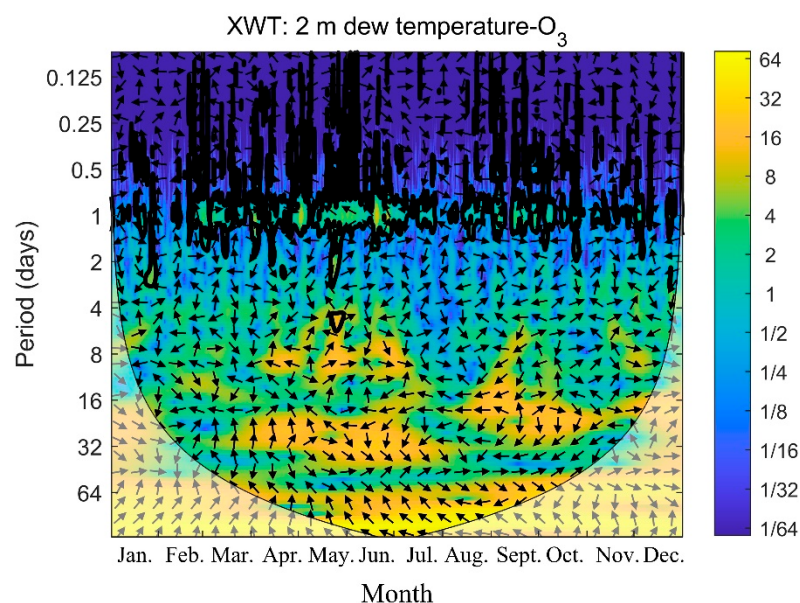

**Figure S6.** Crossed wavelet spectrum (XWT) of 2m dew temperature and  $O_3$ . The left axis is the period, the right axis represents intensity of common period, the bottom axis is time. The area surrounded by the thick black solid line indicates the area that passes the 95% red noise confidence test, and the black solid line envelope is the conical influence domain; the relative phase relationship is shown by the arrows (in-phase points to the right, anti-phase points to the left,  $NO_2$  leads  $O_3$  1/4 period when points straight up).

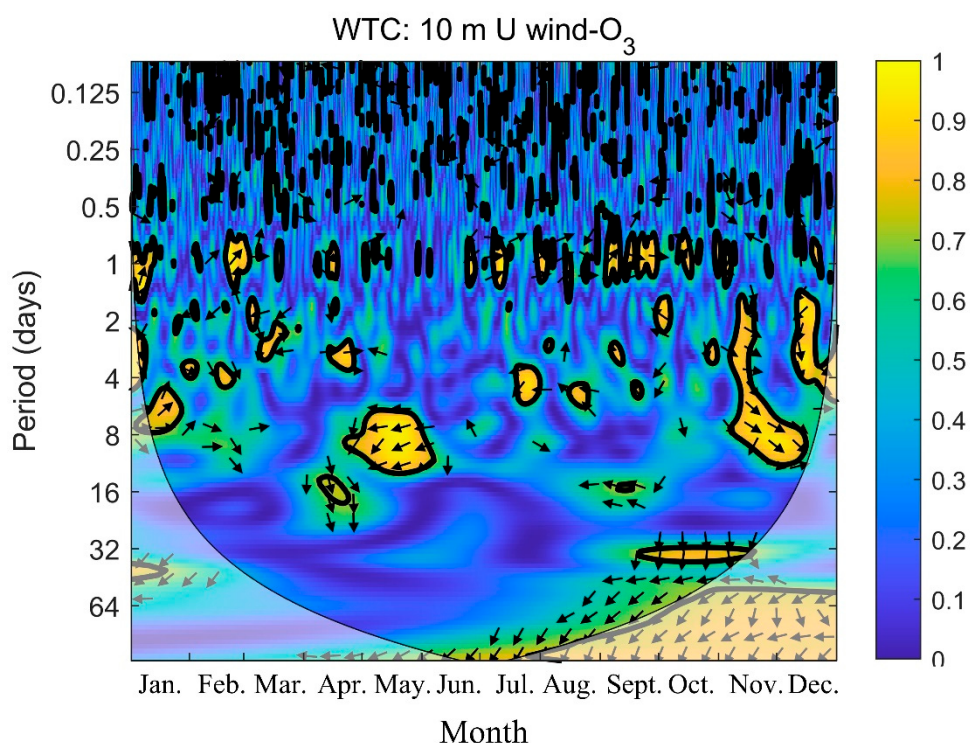

**Figure S7.** Wavelet coherence spectrum (WTC) of 10m u-component of wind (10m U wind) and  $O_3$ . The illustration of figure is the same as Figure S6.

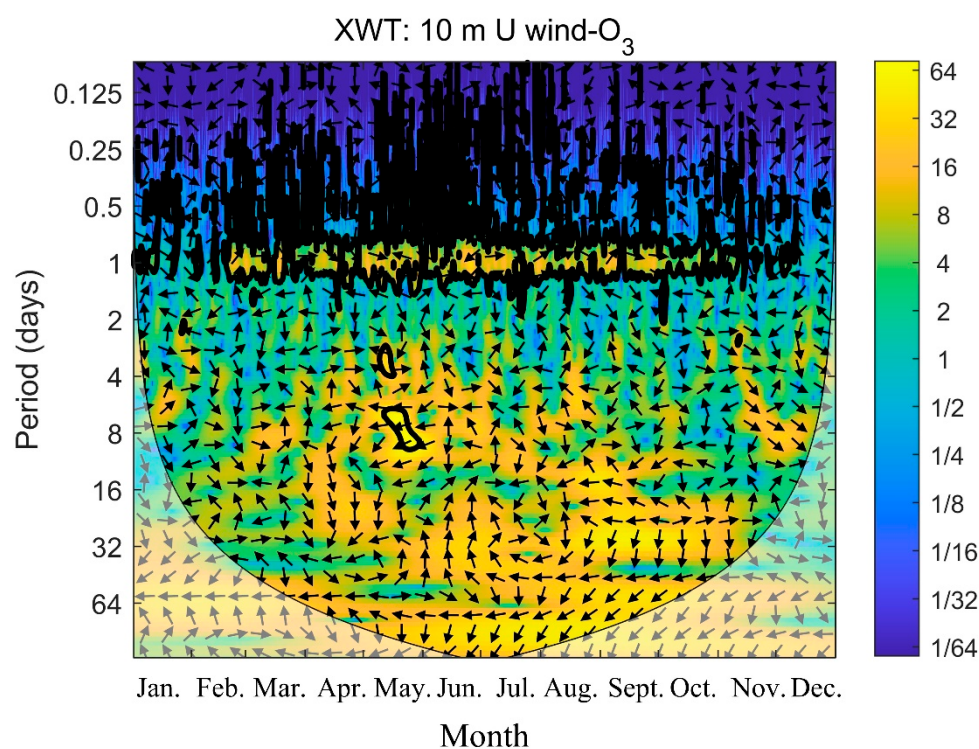

**Figure S8.** Crossed wavelet spectrum (XWT) of 10m u-component of wind (10m U wind) and  $O_3$ . The illustration of figure is the same as Figure S7.

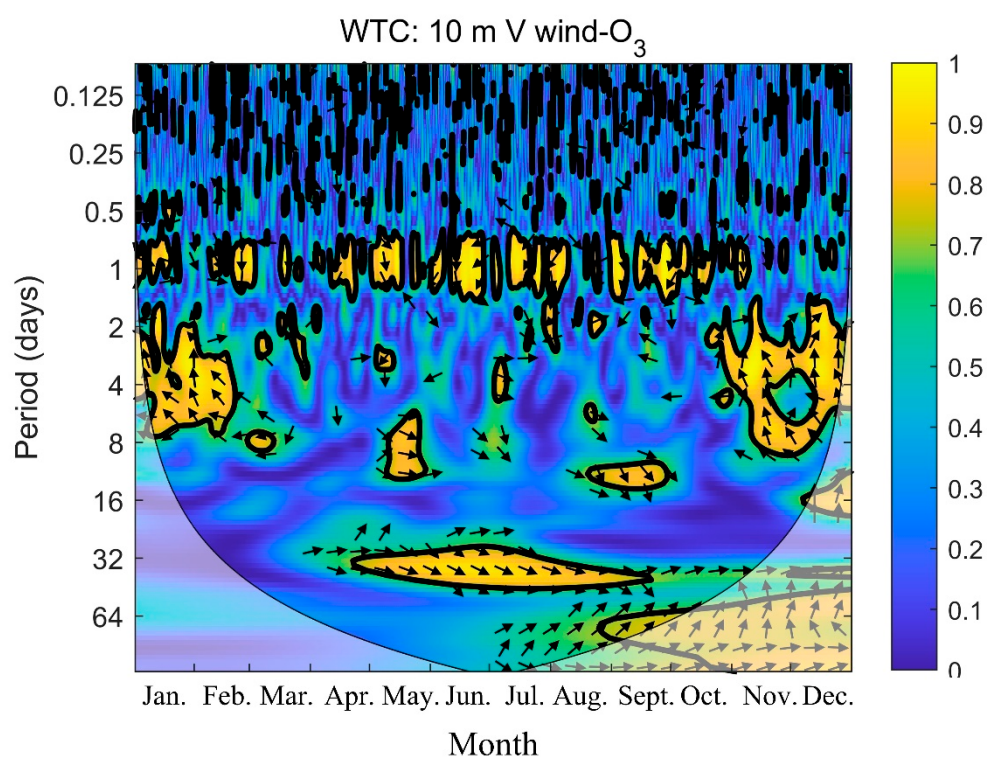

**Figure S9.** Wavelet coherence spectrum (WTC) of 10m v-component of wind (10m V wind) and  $O_3$ . The illustration of figure is the same as Figure S6.

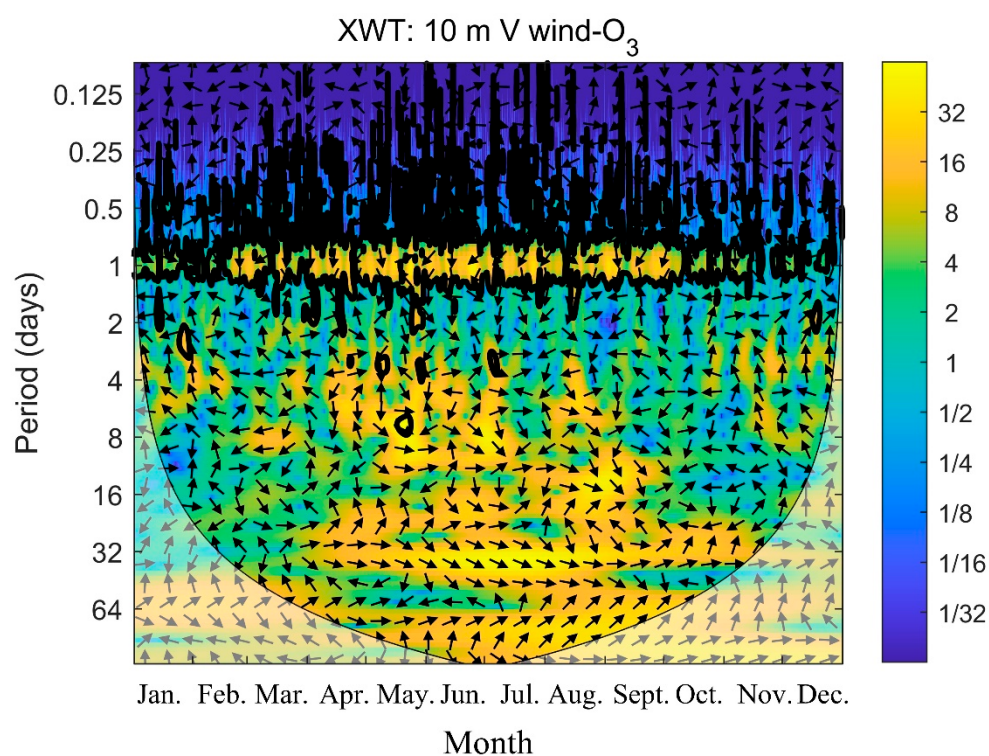

**Figure S10.** Crossed wavelet spectrum (XWT) of 10m v-component of wind(10m V wind) and  $O_3$ . The illustration of figure is the same as Figure S7.

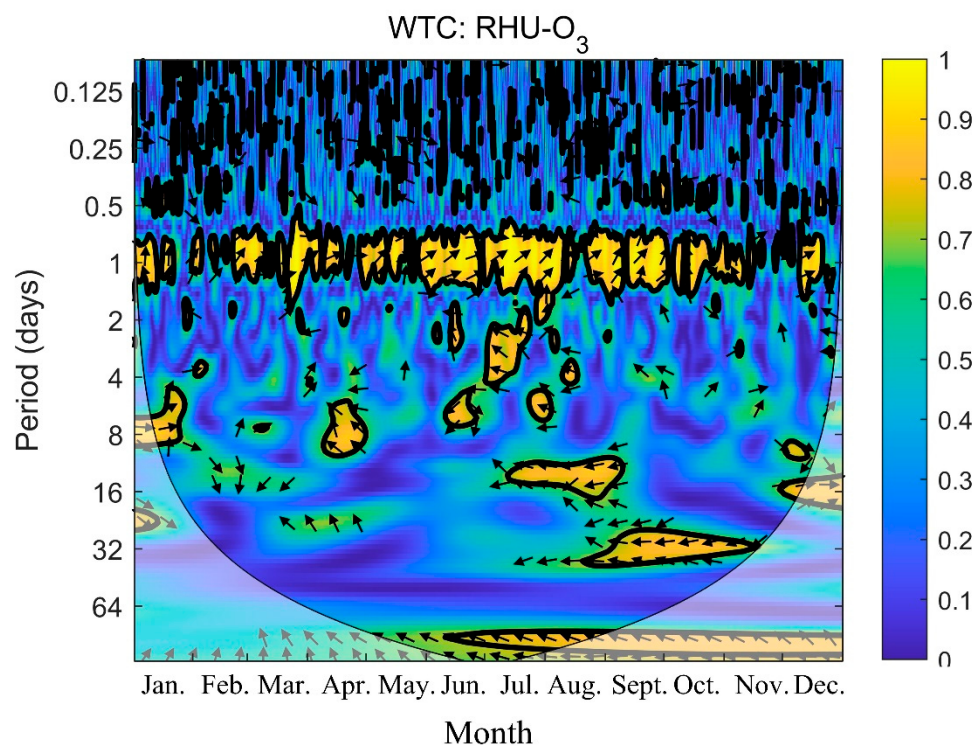

**Figure S11.** Wavelet coherence spectrum (WTC) of relative humidity (RHU) and ozone( $O_3$ ). The illustration of figure is the same as Figure S6.

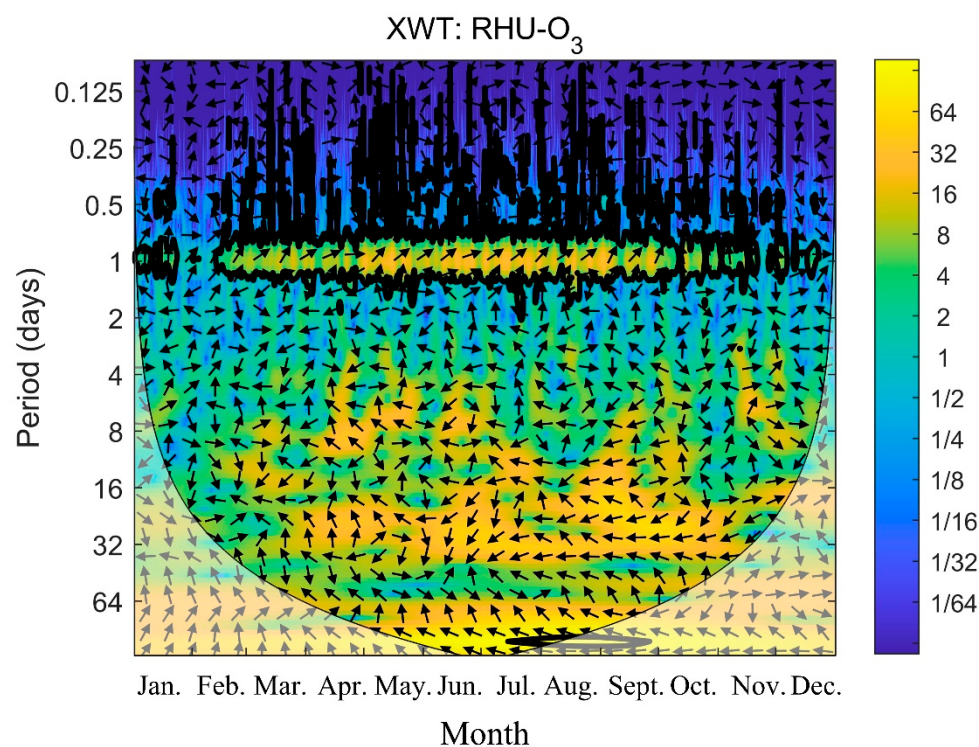

**Figure S12.** Crossed wavelet spectrum (XWT) of relative humidity (RHU) and ozone(O<sub>3</sub>). The illustration of figure is the same as Figure S7.

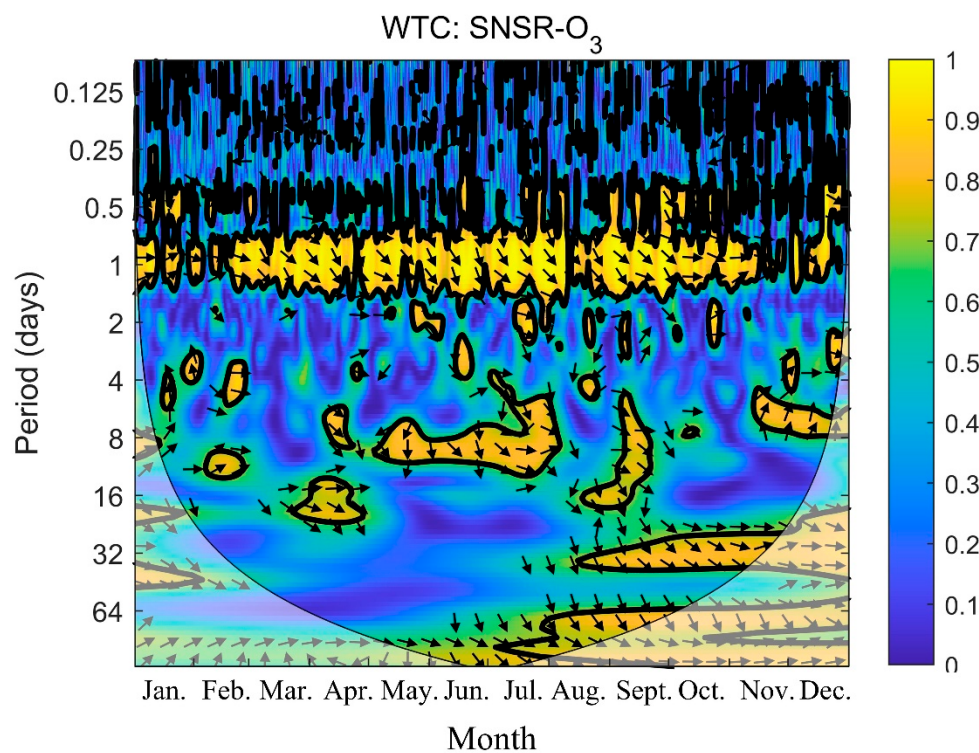

**Figure S13.** Wavelet coherence spectrum (WTC) of surface net solar radiation(SNSR) and ozone(O<sub>3</sub>). The illustration of figure is the same as Figure S6.

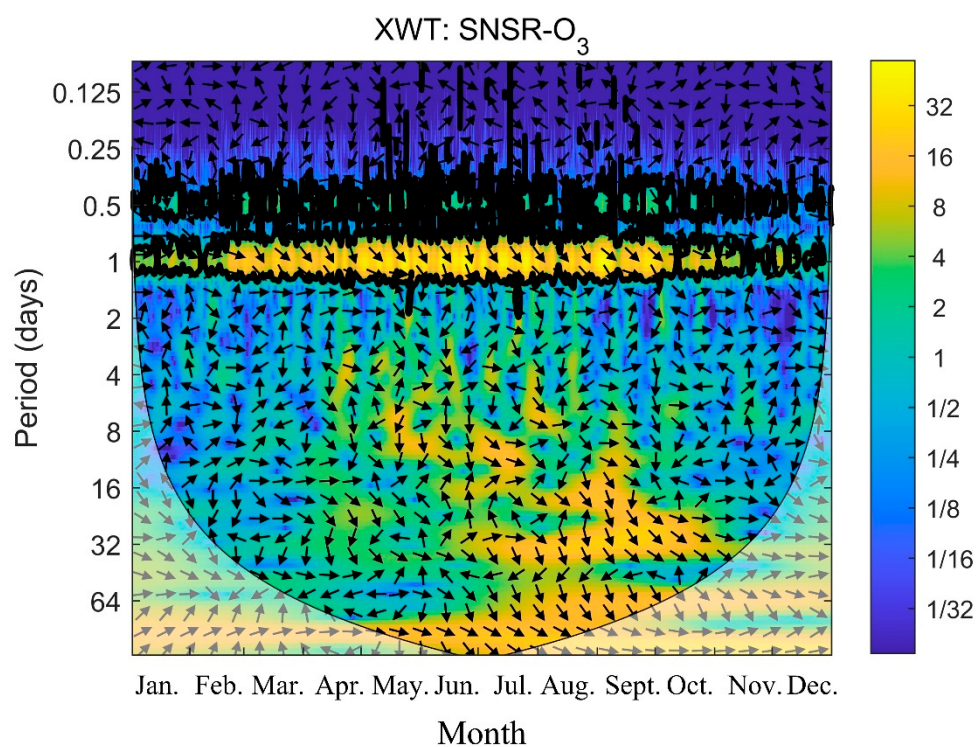

**Figure S14.** Crossed wavelet spectrum (XWT) of surface net solar radiation(SNSR) and ozone( $O_3$ ). The illustration of figure is the same as Figure S7.

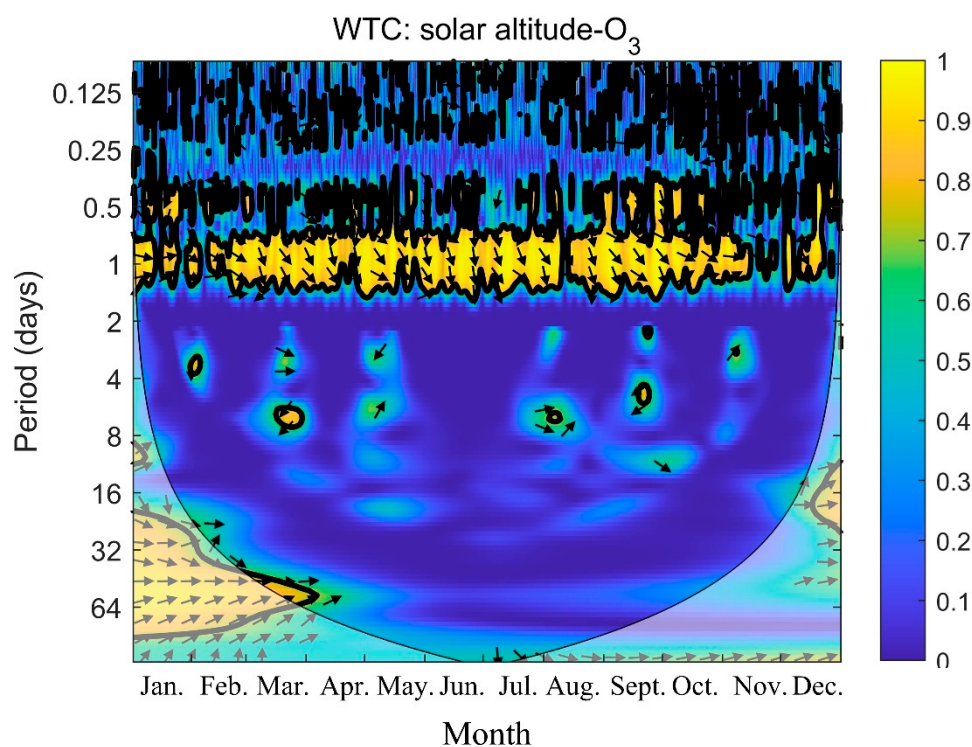

**Figure S15.** Wavelet coherence spectrum (WTC) of solar altitude and ozone( $O_3$ ). The illustration of figure is the same as Figure S6.

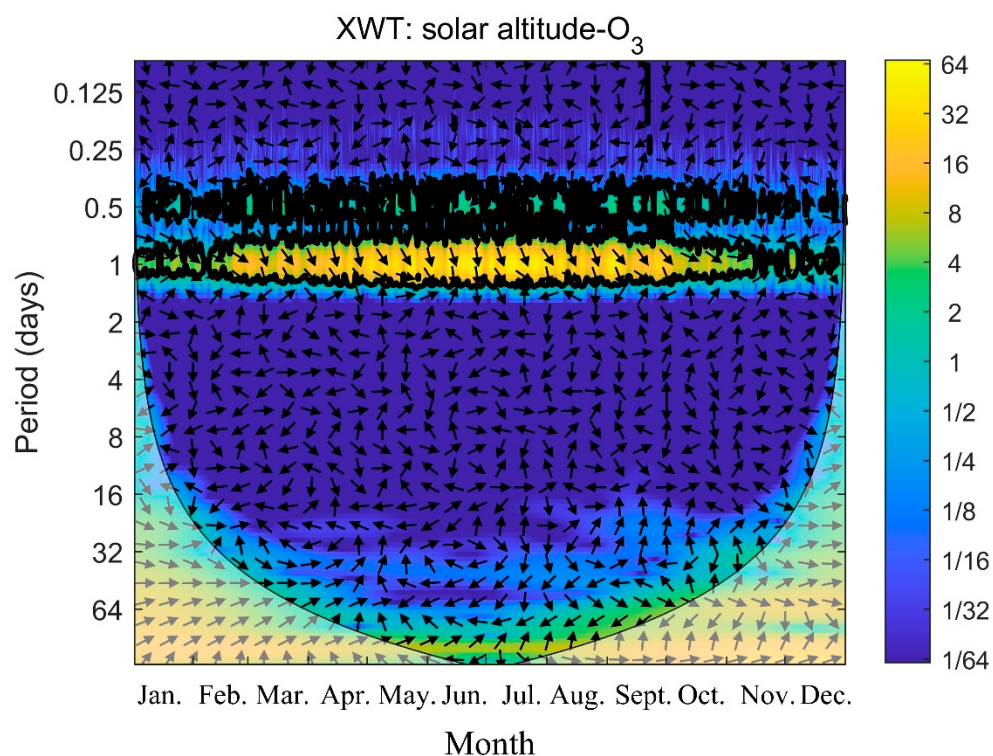

**Figure S16.** Crossed wavelet spectrum (XWT) of solar altitude and ozone( $O_3$ ). The illustration of figure is the same as Figure S7.

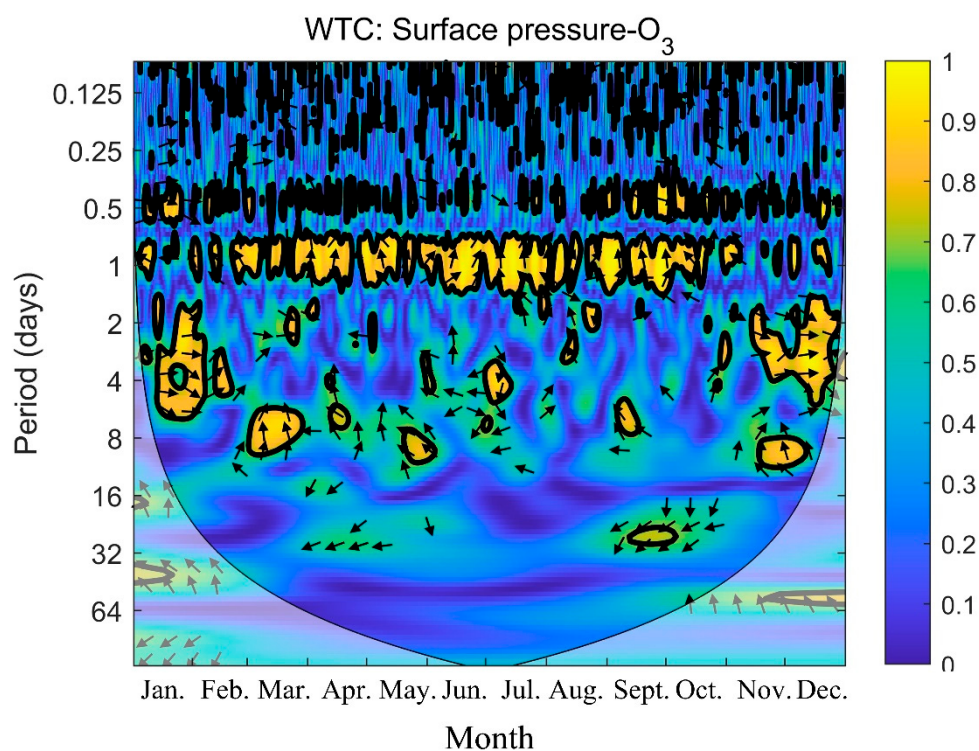

**Figure S17.** Wavelet coherence spectrum (WTC) of surface pressure and ozone( $O_3$ ). The illustration of figure is the same as Figure S6.

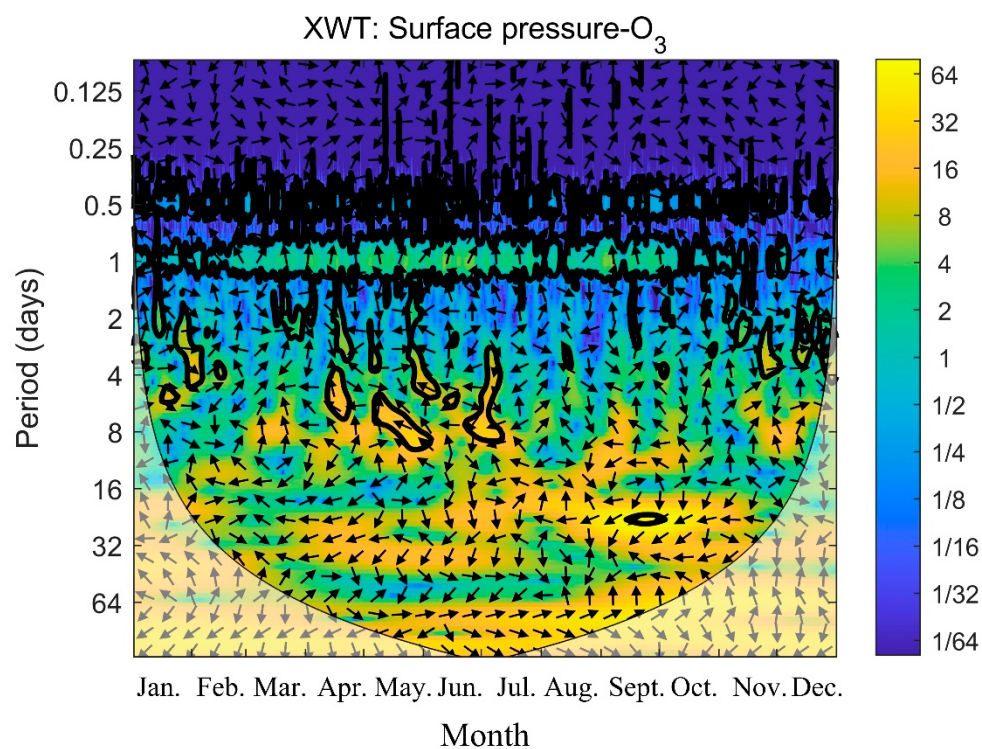

**Figure S18.** Crossed wavelet spectrum (XWT) of surface pressure and ozone( $O_3$ ). The illustration of figure is the same as Figure S7.

**Table S1.** Parameters from ERA5 land reanalysis data and observation stations.

| ID | Name                                | Description                                                                                                                | Units             |
|----|-------------------------------------|----------------------------------------------------------------------------------------------------------------------------|-------------------|
| 1  | Ozone(O <sub>3</sub> )              | Observation of ground-level ozone concentrations                                                                           | µg/m <sup>3</sup> |
| 2  | Nitrogen dioxide (NO <sub>2</sub> ) | Observation of ground-level NO <sub>2</sub> concentrations                                                                 | µg/m <sup>3</sup> |
| 3  | 2m temperature                      | Temperature of air at 2 meters above the surface of land, sea or in-land waters.                                           | K                 |
| 4  | 10m u-component of wind             | Eastward component of the wind at 10 meters above the surface.                                                             | m·s <sup>-1</sup> |
| 5  | 10m v-component of wind             | Northward component of the wind at 10 meters above the surface.                                                            | m·s <sup>-1</sup> |
| 6  | Surface net solar radiation         | Amount of solar radiation reaching the surface of the Earth minus the amount reflected by the Earth's surface.             | J·m <sup>-2</sup> |
| 7  | Surface pressure                    | Pressure (force per unit area) of the atmosphere on the surface of land, sea and in-land water.                            | Pa                |
| 8  | 2m dewpoint temperature             | Temperature to which the air, at 2 meters above the surface of the Earth, would have to be cooled for saturation to occur. | K                 |
| 9  | Relative humidity                   | The percentage of water vapor pressure in the air to the saturated water vapor pressure at the same temperature.           | Dimensionless     |
| 10 | solar altitude                      | The Angle between the incoming direction of sunlight and the ground plane at a place on the earth                          | Degree            |

Note. 1,2 were from Shunyi station (40.1269° N, 116.655° E) in Beijing. 3–8 were from ERA5 land reanalysis data (<https://www.ecmwf.int/en/forecasts/datasets/reanalysis-datasets/era5>, accessed on 18 July 2021). 9,10 were calculated by researchers.

**Table S2.** Number and percentage of missing gaps for air pollutants and meteorological data.

| Missing Gaps | Ozone      | NO2        | All Meteorological Variables |
|--------------|------------|------------|------------------------------|
| 1            | 98(63.23%) | 85(68.00%) | —                            |
| 2            | 23(14.84)  | 18(14.00%) | —                            |
| 3            | 10(6.45%)  | 5(4.00%)   | —                            |
| 4            | 5(3.23%)   | 1(0.80%)   | —                            |
| 5            | 2(1.29%)   | 2(1.60%)   | —                            |
| >5           | 17(10.97%) | 14(11.20%) | —                            |

Note. The time series of all meteorological variables did not have missing values.

**Table S3.** The periods and phase relationship of influencing factors and ozone.

| Month    |        | NO <sub>2</sub> | 2m temperature      | 10m V-wind component | 10m U-wind component | Relative Humidity | 2m dewpoint temperature | Surface net solar radiation | Solar altitude   | Surface pressure |
|----------|--------|-----------------|---------------------|----------------------|----------------------|-------------------|-------------------------|-----------------------------|------------------|------------------|
| January  | period | 0.25-8d         |                     | 2-8d                 |                      |                   |                         |                             |                  | 2-6d             |
|          | phase  | anti-phase      | uncertain           | 1/4 cycle ahead      | uncertain            | uncertain         | uncertain               | uncertain                   | uncertain        | in-phase         |
| February | period | 0.25-8d         |                     | 2-8d                 |                      |                   |                         |                             |                  |                  |
|          | phase  | anti-phase      | uncertain           | 1/4 cycle ahead      | uncertain            | uncertain         | uncertain               | uncertain                   | uncertain        | uncertain        |
| March    | period | 0.25-8d         | 22-26h;6d           |                      |                      | 1d                |                         | 22-26h                      | 22-26h           | 8d               |
|          | phase  | anti-phase      | in-phase            | uncertain            | uncertain            | 1/8 cycle ahead   | uncertain               | in-phase                    | 1/8 cycle behind | 1/4 cycle ahead  |
| April    | period | 0.25-8d         | 22-26h;6-10d;32-48d |                      |                      | 1d                |                         | 22-26h;16d                  | 22-26h           | 22-26h           |
|          | phase  | anti-phase      | in-phase            | uncertain            | uncertain            | 1/8 cycle ahead   | uncertain               | in-phase                    | 1/8 cycle behind | 1/4 cycle ahead  |

|           |        |            |                     |                 |                 |                 |            |           |                  |                 |
|-----------|--------|------------|---------------------|-----------------|-----------------|-----------------|------------|-----------|------------------|-----------------|
| May       | period |            | 22-26h;6-10d;32-48d | 32d             | 8d              | 1d              |            | 22-26h;8d | 22-26h           | 22-26h          |
|           | phase  | uncertain  | in-phase            | in-phase        | anti-phase      | 1/8 cycle ahead | uncertain  | in-phase  | 1/8 cycle behind | 1/4 cycle ahead |
| June      | period |            | 22-26h;6-10d;32-48d | 32d             |                 | 1d              |            | 22-26h;8d | 22-26h           | 22-26h          |
|           | phase  | uncertain  | in-phase            | in-phase        | uncertain       | 1/8 cycle ahead | uncertain  | in-phase  | 1/8 cycle behind | 1/4 cycle ahead |
| July      | period |            | 22-26h;6-10d;32-48d | 32d             |                 | 1d              | 16d        | 22-26h;8d | 22-26h           | 22-26h          |
|           | phase  | uncertain  | in-phase            | in-phase        | uncertain       | 1/8 cycle ahead | anti-phase | in-phase  | 1/8 cycle behind | 1/4 cycle ahead |
| August    | period |            | 22-26h;32-48d       | 32d             |                 | 1d              |            | 22-26h    | 22-26h           | 22-26h          |
|           | phase  | uncertain  | in-phase            | in-phase        | uncertain       | 1/8 cycle ahead | uncertain  | in-phase  | 1/8 cycle behind | 1/4 cycle ahead |
| September | period |            | 22-26h;32-48d       | 32d             |                 | 1d              |            | 32d       | 22-26h           | 22-26h          |
|           | phase  | uncertain  | in-phase            | in-phase        | uncertain       | 1/8 cycle ahead | uncertain  | in-phase  | 1/8 cycle behind | 1/4 cycle ahead |
| October   | period | 0.25-8d    | 22-26h;32-48d       |                 | 32d             | 1d              |            | 32d       | 22-26h           |                 |
|           | phase  | anti-phase | in-phase            | uncertain       | 3/4 cycle ahead | 1/8 cycle ahead | uncertain  | in-phase  | 1/8 cycle behind | uncertain       |
| November  | period | 0.25-8d    |                     | 2-8d            | 8d              |                 |            | 32d       |                  | 2-4d            |
|           | phase  | anti-phase | uncertain           | 1/4 cycle ahead | 7/8 cycle ahead | uncertain       | uncertain  | in-phase  | uncertain        | in-phase        |
| December  | period | 0.25-8d    |                     | 2-8d            |                 |                 |            | 8d        |                  |                 |
|           | phase  | anti-phase | uncertain           | 1/4 cycle ahead | uncertain       | uncertain       | uncertain  | in-phase  | uncertain        | uncertain       |
